# Supplementary material for: A novel role for vaping in mitochondrial gene dysregulation and inflammation fundamental to disease development
Source: PubMed Central journal article supplement (PMC8611078; doi:10.1038/s41598-021-01965-1), 2021-11-23

### PRSS23

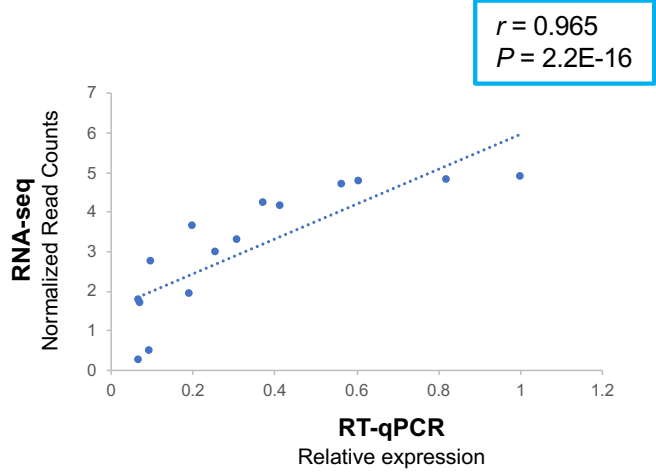

### SLC1A7

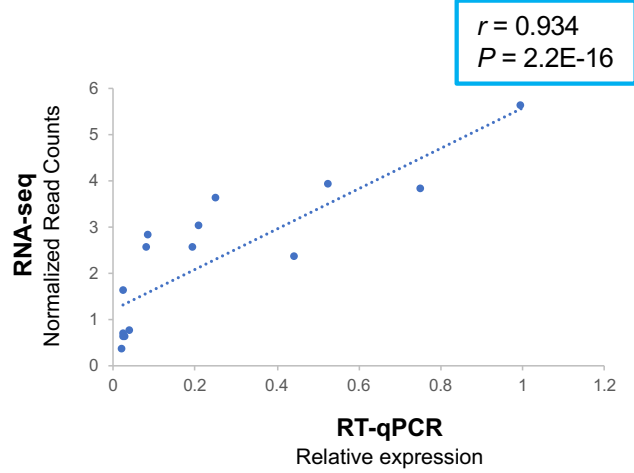

### B3GAT1

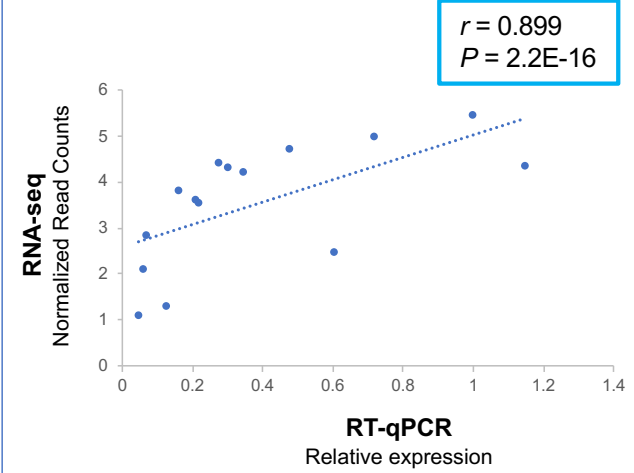

### COL27A1

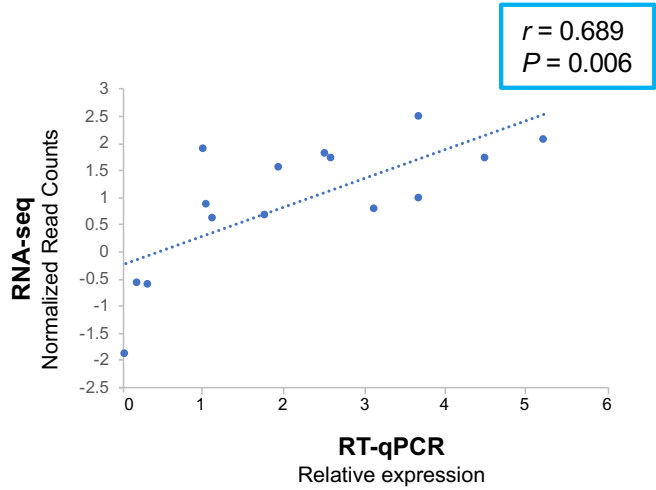

### NUAK1

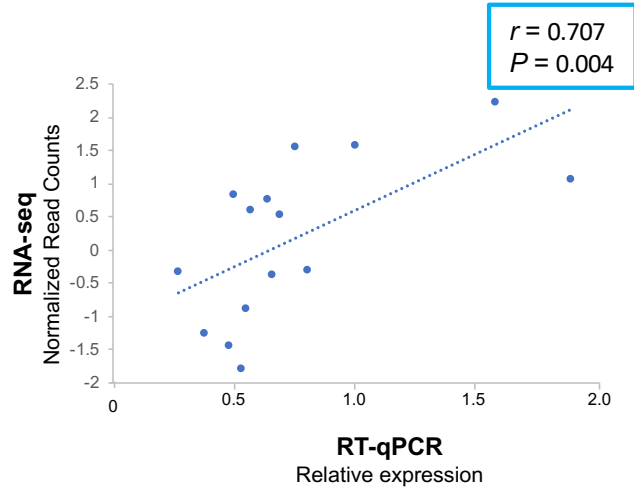

### NINL

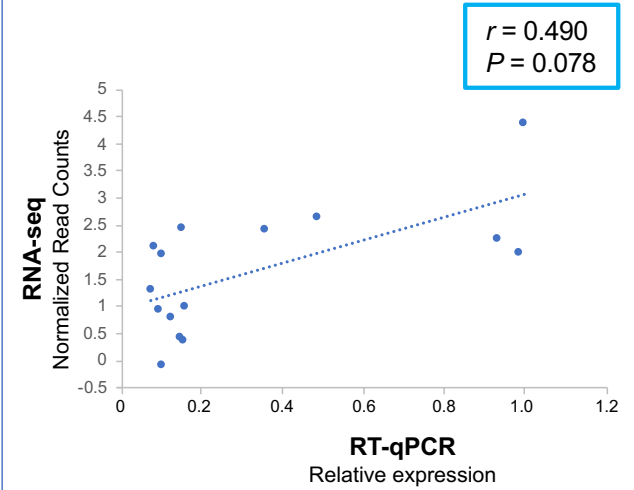

Supplement: 41598_2021_1965_MOESM3_ESM.pdf [file 41598_2021_1965_MOESM3_ESM.pdf]
